# Supplementary material for: Inferring the Photolysis Rate of NO 2 in the Stratosphere Based on Satellite Observations
Source: Copernicus journal article supplement (doi:10.5194/egusphere-2023-557), 2023-03-30
Supplement: Supplementary file 1 [file egusphere-2023-557-supplement.pdf]

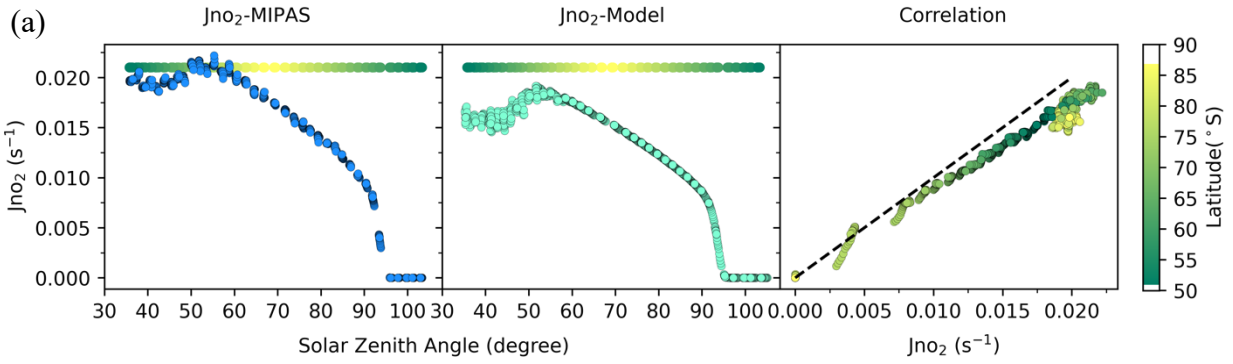

1

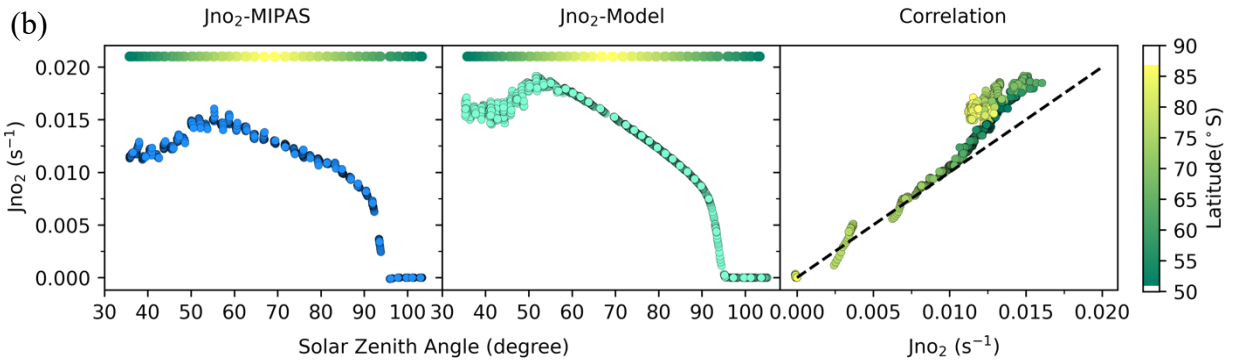

2

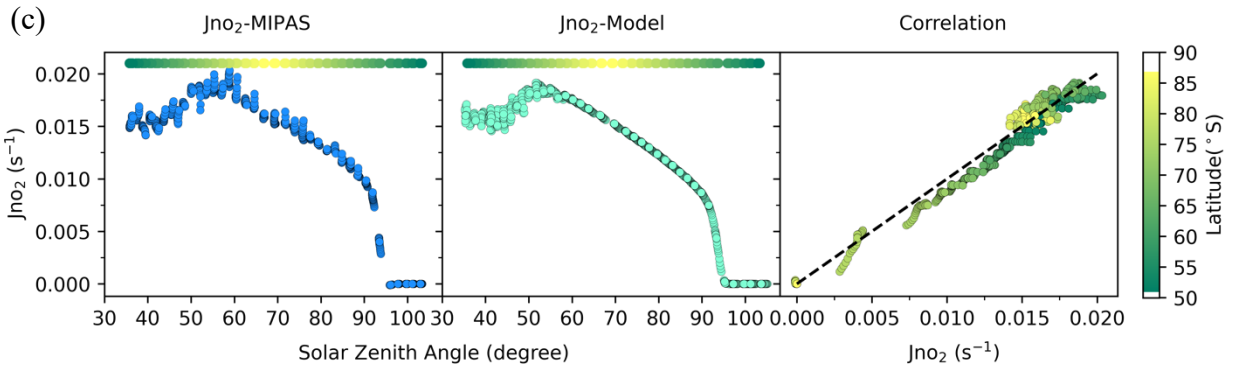

3

4 Figure S1. The  $J_{\text{NO}_2}$  in  $50^\circ \text{ S} - 90^\circ \text{ S}$  from MIPAS and model considering different species at 38 km. (a)  
 5 Only the reaction of NO with  $\text{O}_3$  and the photolysis of  $\text{NO}_2$  are considered. (b) In addition to the reactions  
 6 in (a), the reaction of O with  $\text{NO}_2$  is considered. (c) In addition to the reactions in (a), the reaction of O with  
 7  $\text{NO}_2$  and the reaction of ClO with NO are also considered. Model data is for the same time and location as  
 8 the satellite data. The color strip represents the latitude source of data points at the same solar zenith angle.  
 9 Each point in  $J_{\text{NO}_2}$ -Model and  $J_{\text{NO}_2}$ -MIPAS represents the four-day running mean of the average  $J_{\text{NO}_2}$  of

10 multiple daily measurements at two latitude degree intervals. In the correlation plots, the abscissa is  $J_{\text{NO}_2}$ -  
11 MIPAS and the ordinate is the  $J_{\text{NO}_2}$ -Model.

12 In order to better understand which species will have a significant impact on NOx chemistry,  $J_{\text{NO}_2}$   
13 calculated by considering different species at 38 km is shown in Figure S1. When only the reaction of NO  
14 with  $\text{O}_3$  and the photolysis of  $\text{NO}_2$  are considered, the calculated  $J_{\text{NO}_2}$  value from satellite data is  
15 significantly higher than the model values. After considering the reaction of O with  $\text{NO}_2$ , the  $J_{\text{NO}_2}$  value  
16 calculated by satellite data has changed substantially, which indicates that O has a large influence on NOx  
17 chemistry. When the reaction of ClO and NO is also considered, the calculated  $J_{\text{NO}_2}$  value matches well  
18 with the model data, which also indicates that ClO should be considered in NOx chemistry at 38 km. It is  
19 worth noting that at other altitudes, due to the different profiles of each species, the importance to NOx  
20 chemistry is also different. When the altitude is lower than 35 km, the concentrations of ClO and O are very  
21 low, and hardly affect NOx chemistry. Moreover, the satellite data error of ClO is very large, so ClO should  
22 be ignored in such calculations when the altitude is lower than 35km to avoid introducing unnecessary error.

23 When the altitude is higher than 40km, the concentration of  $\text{HO}_2$  increases, so  $\text{HO}_2$  can have a large impact  
24 on NOx chemistry at higher altitudes than those considered here.  $\text{HO}_2$  data can't be measured by MIPAS,  
25 so the  $J_{\text{NO}_2}$  at an altitude higher than 40 km is not included in this work.

26
